# Supplementary material
Source: Springer Nature journal article supplement (https://www.springermedizin.de/resource/supplementary/12904_2012_193_MOESM1_ESM.pdf/9517844)
Supplement: MOESM1 [file 9517844]

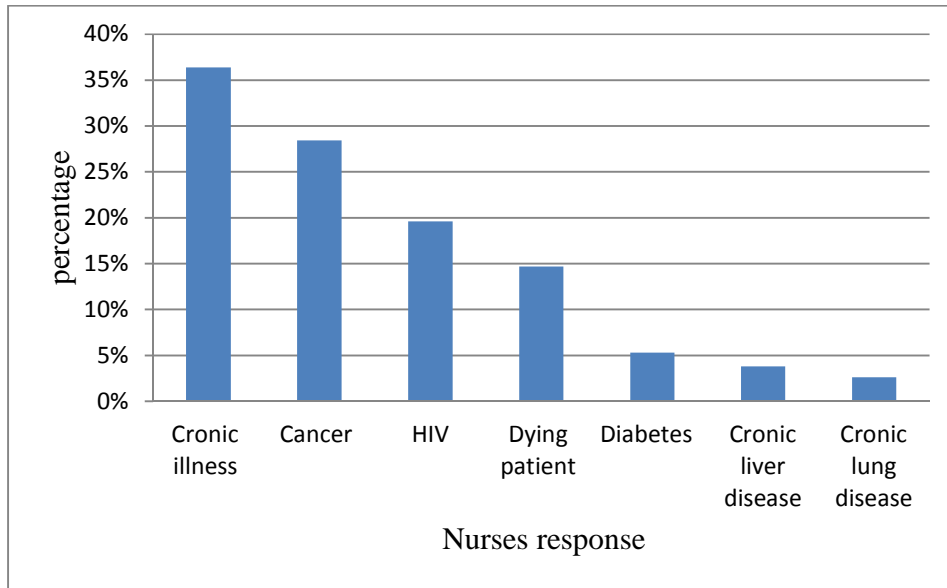

Figure 1. Response of nurses about importance of palliative care at selected hospitals in Addis Ababa, May 2012.
